# Supplementary material for: Understanding of Morphometric Features for an Adequate Water Resources Management in Arid Environments
Source: Copernicus journal article supplement (doi:10.5194/gi-2017-28), 2017-04-19
Supplement: Supplementary file [file gi-2017-28-RC3-supplement.pdf]

1 **Understanding of Morphometric Features for an Adequate Water Resources Management**  
2 **in Arid Environments**

3 **Mohamed Elhag\*<sup>1</sup>, Hanaa K. Galal<sup>2,3</sup>, and Haneen Alsubaie<sup>2</sup>**

4 <sup>1</sup>Department of Hydrology and Water Resources Management, Faculty of Meteorology,  
5 Environment & Arid Land Agriculture, King Abdulaziz University  
6 Jeddah, 21589. Saudi Arabia.

7 <sup>2</sup>Biological Sciences Department, Faculty of Science, King Abdulaziz University,  
8 Jeddah 21589. Saudi Arabia.

9 <sup>3</sup>Botany Department, Faculty of Science, Assiut University, Assyut, Egypt

10 Correspondence email: [melhag@kau.edu.sa](mailto:melhag@kau.edu.sa)

11 **Abstract**

12 The current research investigates the significance of remote sensing data to evaluate the  
13 fluviological features and to identify the morphometric parameters of Yalamlam basin, West of  
14 Saudi Arabia. Hydrological characteristics, such as topographic parameters, drainage attributes,  
15 and the land use, land cover pattern were evaluated for the water resource management of the  
16 watershed area. Under GIS environment, the delineation of the watershed and the calculation of  
17 morphometric characteristics using ASTER GGDEM was undertaken. The drainage density of the  
18 basin has been estimated to be very high which indicates that the watershed possesses high  
19 permeable soils and low to medium relief (Hadley and Schumn 1961). The stream order of the  
20 area ranges from first to sixth order showing semi dendritic and radial drainage pattern that  
21 indicates the heterogeneity in textural characteristics and is influenced by structural characteristics  
22 in the study area. The bifurcation ratio (Rb) of the basin ranges from 2.0 to 4.42 and the mean  
23 bifurcation ratio is 3.84 of the entire study area that signifies that the drainage pattern of the entire  
24 basin is much more controlled by the lithological and geological structure. The elongation ratio is  
25 0.14, which indicates that the shape of the basin belongs to the narrow and elongated shape. Land

Commented [R.1]: Unnecessary text

Commented [R.2]: Are essential to evaluate

Commented [R.3]: In the current study

26 use and land cover map were generated by using Landsat-8 image acquired on August 10<sup>th</sup> 2015  
27 was classified to distinguish mainly the alluvial deposit from the mountainous rock. The study  
28 reveals that hydrological evaluation using ASTER GGDEM is more precise and applied with  
29 compared to other techniques at the watershed scale.

Commented [R.4]: Delete

Commented [R.5]: was

Commented [R.6]: and was

Commented [R.7]: please rephrase

30 **Keywords:** Hydrological characteristics, Morphometric characteristics, Remote Sensing and GIS  
31 techniques, Wadi Yalamlam, Watershed management.

## 32 1. Introduction

33 The choice of an optimal interpolation method, for the prediction of soil properties at unsampled  
34 locations, is a subject of great importance in agricultural management studies. Several attempts  
35 had been made in order to specify the most accurate interpolation technique for the generation of  
36 continuous soil attributes surfaces.

Commented [R.8]: unnecessary text

37 Most of the soil studies using interpolation techniques include the Inverse Distance Weighted and  
38 Kriging methods. The accuracy of these methods has been compared in several studies. Gotway et  
39 al. (1996) found that the IDW method generated more accurate results for mapping soil organic  
40 matter and soil NO<sub>3</sub> levels. Wollenhaupt et al. (1994) compared these two interpolation techniques  
41 and concluded that IDW was more accurate for mapping P and K levels of soil. Mueller et al.  
42 (2004) observed that for the optimal parameters of the method, the accuracy of IDW interpolation  
43 generally equaled or exceeded the accuracy of kriging at each scale of measurement. On the other  
44 hand, other researchers observed Kriging to be more accurate for the interpolation of soil attributes.  
45 Leenaers et al. (1990) found Kriging interpolation method the most accurate in comparison to  
46 IDW, for mapping soil Zn content.

Commented [R.9]: rephrase

Commented [R.10]: scholarly work

47 Other studies compared Kriging IDW and Radial Basis Functions interpolation techniques in soil  
48 science. Schloeder et al. (2001) observed that Ordinary kriging and inverse-distance weighting  
49 were similarly accurate and effective methods, while thin-plate smoothing spline with tensions  
50 was not. Weller et al. (2007) resolved that not only the predications for kriging were not satisfied  
51 the kriging method, but also was as good as any other radial base function interpolation.

Commented [R.11]: additional

52 Since the early decades of the century, spatial variability of soil properties has been widely studied  
53 in order to understand the behavior of soils for agricultural purposes. Knowledge, of spatial  
54 variability and relationships among soil properties, is important for the generation of soil maps for  
55 reasons of land management.

Commented [R.12]: unnecessary text

56 Hydrological parameters are essential for adequate water resources management plans.  
57 Morphometric characteristics aim to investigate the watershed delineation, site selection in water  
58 recharge and discharge, run off modelling and other geomorphological studies (Sreedevi et al.,  
59 2013; Elhag, 2015). GIS helps a wide variety of basin characterization and evaluation applications  
60 under different terrain conditions (Pankaj and Kumar, 2009; Magesh et al., 2011).

61 Digital Elevation Model (DEM), such as ASTER GDEM (USGS, USA) is the keystone  
62 involvement in various extractions of Geo hydrological parameters of the watershed. Several  
63 parameters including slope, aspect, stream network, and upstream flow areas can be conducted  
64 from the DEM characterization (Grohmann et al., 2007; Elhag, 2015). Reliable results of  
65 implementing Remote sensing and GIS based morphometric evaluation using ASTER GDEM data  
66 have been reported in numerous scholarly work of watershed characterization (Farr and Kobrick,  
67 2000; Panhalkar, 2014; Elhag, 2015). Author's refers that ASTEDR GDEM is more useful and

68 very accurate tool for the watershed delineation and morphometric evaluation for the watershed  
69 management.

Commented [R.13]: unnecessary text

70 The conducted results of the current study discuss that the analysis of methodical information and  
71 further hydrological and morphometric investigation can find out satisfactory alternative strategies  
72 for adequate rainwater harvesting based on observed calculations in the designated study  
73 watershed. The main aim of the present study is to identify and investigate various drainage  
74 attributes to geometrical evaluation of Yalamlam basin for the sustainable rainwater harvesting  
75 management and conservation of water resources.

Commented [R.14]: misplaced, its good for conclusion

## 76 2. Materials and Methods

### 77 2.1. Study Area

78 Wadi Yalamlam basin is located about 125 km southeast of Jeddah city and is bounded by latitudes  
79  $20^{\circ} 26'$  and  $21^{\circ} 8'N$  and longitudes  $39^{\circ} 45'$  and  $40^{\circ} 29'E$  (Figure 1). Wadi Yalamlam basin drained  
80 large catchment area of about 180,000 hr. The basin boundary of the lower part is enlarged to  
81 include nearly all the flat area in the downstream part. Wadi Yalamlam basin is initiated from high  
82 elevation Hijaz escarpment with mean annual rainfall of about 140 mm. The basin elevations are  
83 greatly varies from upstream and downstream parts and range between 2850 m and 25 m (a.s.l.)  
84 respectively. The main course of Wadi Yalamlam is crosscut the highly fractured granitoids,  
85 gabbroic and metamorphic rocks until the coastal plain of the Red Sea. The upper and middle parts  
86 of Wadi Yalamlam basin are covered by intense natural vegetation. The lower part is covered  
87 mainly by Quaternary deposits and sand dunes with small-scattered highly altered granitoids and  
88 metamorphosed basaltic hills. Several basic dykes are recorded in the lower part of Wadi  
89 Yalamlam basin. The thickness of Quaternary wadi deposits increased in the lower part (Elhag and

90 Bahrawi 2017). Regional groundwater flow drains toward the south and southwest following the  
91 general trend of the main wadi channel. The gradient of the water table varies from one area to  
92 another according to the variations in the pumping rates and hydraulic properties of the aquifer. It  
93 has an average value of about 0.011. The high pressure of the subtropical zone in addition to local  
94 topography affects climate in Yalamlam basin. Both regional and local circulations have a  
95 dominant influence on the climate of the region. From the temperature records in the Red Sea coast  
96 stations, the mean monthly maximum temperature is 38°C and the mean monthly minimum  
97 temperature is 20°C. The highest recorded temperature in July is 49°C and the lowest in January is  
98 12°C. The maximum mean monthly evaporation value is around 500 mm in summer, where in  
99 winter it is about 200 mm (Elhag, 2016)

Commented [R.15]: please rephrase

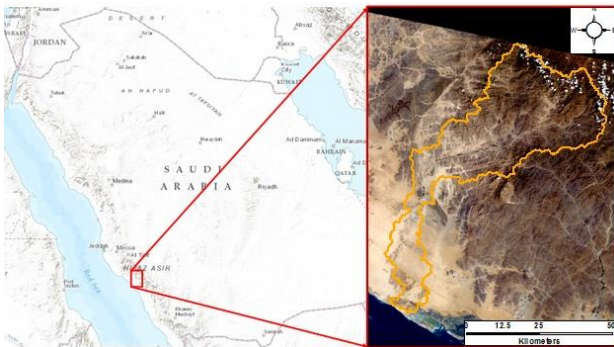

100  
101 **Figure 1. Location of the study area (Elhag 2016).**

## 102 2.2. Soil sampling

103 Map accuracy and quality depends on the sampling method to be used, scale, analytical laboratory  
104 errors and prediction errors. Sampling approaches depend on the objectives of the study that are  
105 highly correlated to scale. Random Stratified Sampling was the adopted sampling design, the

Commented [R.16]: delete

106 landscape is divided into smaller areas, named strata, and afterwards 150 random samples are taken  
107 from the designated study area.

**Commented [R.17]:** please support your chosen sampling technique by 1 citation or more

### 108 2.3. Physical and Chemical soil analysis

109 Each individual sample was analyzed separately and each measurement was repeated three times  
110 for the same extract. Thus, the final values of the measured attributes are represented by the mean  
111 value of nine measurements. Soil samples were analyzed in order to estimate physical analysis  
112 (clay, silt and sand) and chemical analyses (pH, Calcium Carbonate, Electric Conductivity,  
113 Minerals and Organic Content) including all samples.

**Commented [R.18]:** I think you mean three not nine

**Commented [R.19]:** analyses

**Commented [R.20]:** rephrase

**Commented [R.21]:** please omit

114 For standard particle size measurement, the soil fraction that passes a 2-mm sieve is considered.  
115 Laboratory procedures normally estimate percentage of sand (0.05 - 2.0 mm), silt (0.002 - 0.05  
116 mm), and clay (<0.002 mm) fractions in soils. Soil particles are usually cemented together by  
117 organic matter; this has to be removed by H<sub>2</sub>O<sub>2</sub> treatment. However, if substantial amounts of  
118 CaCO<sub>3</sub> are present, actual percentages of sand, silt or clay can only be determined by prior  
119 dissolution of the CaCO<sub>3</sub>.

120 The chemical procedures presented here are extensive, though by no means exhaustive. For any  
121 given element, there are several procedures or variations of procedures can be found in the  
122 literature (Walsh and Beaton, 1973; Westerman, 1990). Procedure for determining soil pH in a 1:1  
123 (soil: water) suspension was after McLean (1982). The methodology of EC measurement is given  
124 in USDA Handbook 60 (Richards, 1954). Active CaCO<sub>3</sub> is usually related to total CaCO<sub>3</sub> equivalent,  
125 being about 50% or so of the total value. Total CaCO<sub>3</sub>, is currently estimated after Drouineau (1942).

**Commented [R.22]:** there are no need for any chemical analysis as its not taken any part of the results part of the discussion part

126

### 127 2.4. Interpolation techniques

128 Geostatistics interpolation is based on the assumption that all values of a variable that is measured  
129 are the result of a random process. The phrase "random process" does not indicate that all events  
130 are independent. More specifically Geostatistics is based on random processes with dependence,  
131 otherwise called autocorrelation, and relies on some notion of replication. Repeated observations  
132 in nature can result in understanding the variation and uncertainty of natural phenomena, and  
133 furthermore in estimating their sequence in space and time. Three interpolation techniques were  
134 used for the generation of the prediction maps (interpolation). Inverse Distance Weighted (IDW),  
135 Radial Basis Function (RBF) and Ordinary Kriging (OK) method were compared according to the  
136 accuracy of the results.

Commented [R.23]: ,

Commented [R.24]: Techniques are

137 Spatial distribution equation (Weibel, 1997):

$$138 Y_{(k)} = \frac{1}{2 \times n(k)} \times \sum_{i=1}^{n(k)} [Z(x_i) - Z(x_{i+k})]^2$$

139 Where:  $n(k)$  - number of pairs of observation;  $Z(x_i)$  - soil property measured in point  $x$ , and in point  
140  $x + k$ .

141 Interpolation equation (Stoer and Bulirsch., 1980)

$$142 Z_x(X_o) = \sum_{i=1}^n \lambda_i \times Z(x_i)$$

143 Where:  $Z_x(x_o)$  - interpolated value of variable  $Z$  at location  $X_o$ ,  $Z(x_i)$  - values measured at location  
144  $x_i$ ,  $\lambda_i$ ; - weighed coefficients calculated based on the semivariogram.

145 Trend and random error equation (Johnson and Riess, 1982)

$$146 Z(S) = \mu(S) + \varepsilon(S)$$

147 The symbol  $s$  stands for the location of the prediction location.  $Z(S)$  is the variable you are  
148 predicting (total extractable heavy metal concentration).  $\mu(S)$  is the deterministic trend.  $\varepsilon(S)$  is the  
149 spatially-autocorrelated random error.

## 150 2.5. Morphometric parameters

151 Based on the foundation scholarly work of Horton (1945), Schumm (1963), Strahler (1964) and  
 152 others, several morphometric parameters were performed and computed utilizing ASTER GDEM  
 153 under GIS environment. Consequently, watershed delineation, stream network identification,  
 154 drainage frequency, drainage density, shape, elongation ratio, circularity ratio and form factor were  
 155 computed and evaluated using 30m spatial resolution of ASTER GDEM. The methodologies  
 156 adopted for the evaluation and computation of morphometric features are given in Table 1.

## 157 2.6. Supervised classification

158 Remote sensing data was obtained from Landsat Operational Land Imager (OLI-8) which is  
 159 acquired on June 10<sup>th</sup>, 2013. Typical atmospheric and radiometric corrections and spatial  
 160 resolution enhancement were implemented for each band individually. Furthermore, supervised  
 161 classification was implemented using Support Vector Machine (SVM) classifier for better  
 162 classification results (Psilovikos and Elhag, 2013). The final step in the digital image analysis is  
 163 the evaluation of the accuracy of the computer derived classification results. These results are often  
 164 expressed in tabular form, known as a confusion matrix (Elhag et al., 2013). The SVM classifier  
 165 is implemented as:

$$166 K(x_i, x_j) = \tanh(gx_i^T x_j + r)$$

167 Where:

168  $g$  is the gamma term in the kernel function for all kernel types except linear

169  $r$  is the bias term in the kernel function for the polynomial and sigmoid kernels.

170

171 **Table 1. Summary of the implemented morphometric features:**

| Item | Morphometric feature          | Equation                | Citation      |
|------|-------------------------------|-------------------------|---------------|
| 1    | Stream length ( $L_u$ )       | Length of the stream    | Horton (1945) |
| 2    | Stream length ratio ( $R_i$ ) | $R_i = L_u / (L_u + 1)$ | Horton (1945) |



|    |                                     |                                          |                        |
|----|-------------------------------------|------------------------------------------|------------------------|
| 3  | Form factor ( $F_f$ )               | $F_f = A/L^2$                            | Horton (1945)          |
| 4  | Drainage frequency ( $F_d$ )        | $F_d = N_u / A$                          | Horton (1945)          |
| 5  | Drainage density ( $D_d$ )          | $D_d = L_u / A$                          | Horton (1945)          |
| 6  | Drainage texture ( $T$ )            | $T = D_d * F_d$                          | Smith (1950)           |
| 7  | Bifurcation ratio ( $R_b$ )         | $(R_b) = N_u / (N_u + 1)$                | Schumm (1956)          |
| 8  | Elongation ratio ( $R_e$ )          | $R_e = D/L$                              | Schumm (1956)          |
| 9  | Mean bifurcation ratio ( $R_{bm}$ ) | $R_{bm}$ = average of bifurcation ratios | Strahler (1957)        |
| 10 | Relief ( $R$ )                      | $R = H-h$                                | Hadley & Schumm (1961) |
| 11 | Relief ratio ( $R_r$ )              | $R_r = R/L$                              | Schumm (1963)          |
| 12 | Stream order ( $S$ )                | Hierarchical rank                        | Strahler (1964)        |
| 13 | Stream no                           | Order wise no of streams                 | Strahler (1964)        |
| 14 | Mean stream length ( $L_{sm}$ )     | $L_{sm} = L_u / N_u$                     | Strahler (1964)        |
| 15 | Circularity ratio ( $R_c$ )         | $R_c = 4\pi A / P^2$                     | Strahler (1964)        |

Where

$A$  =Area of the basin (km<sup>2</sup>)

$D_d$  =Drainage density

$F_f$  =Form factor

$F_d$  =Stream frequency

$L$  =Basin length (km)

$L_{sm}$  = Mean stream length

$L_{u+1}$  = The total stream length of its next higher order u

$L_u$  = The total stream length of order u

$N_{u+1}$  = Number of stream segments of the next higher order

$N_u$  = The no. of stream segments of order u

$P$  =Perimeter (km)

$R_b$  = Bifurcation Ratio

$R_c$  =Circularity ratio

$R_e$  =Elongation ratio

$RL$  =Stream Length Ratio

$T$  =Drainage texture

$\pi$  =3.14

172

### 173 3. Results and Discussion

174 Quantitative evaluation of the watershed through the analysis of morphometric parameter can  
 175 provide significant information about the hydrological characteristics of rocks, which are exposed  
 176 within the basin. The nature of drainage of a basin reveals reliable information about the  
 177 permeability of the rocks and the yield of the basin.

178 The ASTER GDEM has been collected with 30 m resolution and the GDEM has been used to  
179 generate watershed area, aspects and slope map of the basin. The drainage network of a basin  
180 depends on endogenous forces and exogenous forces. Geology and precipitation pattern of the  
181 study area. ASTER GDEM was used for preparing aspects, slope map of the basin. Areal, relief  
182 and linear aspects of the basin were analyzed under GIS environment. Currently a geospatial  
183 technology has been given more precise and accurate information through the evolution of  
184 morphometric parameter for the assessment of drainage watershed. GIS technology and satellite  
185 data have been used to formulate data on spatial deviations in drainage attributes. Therefore,  
186 drainage parameter provides a significant insight into hydrological characteristics, which is more  
187 important to develop the watershed management strategies (YanYun et al., 2014).

Commented [R.26]: Rephrase, unnecessary text

188 Evaluation of drainage characteristics and other morphometric parameter of Yalamlam basin has  
189 been undertaken to calculate the parameter and built topology of the basin. Different type of Aerial  
190 and linear aspects and their characteristics has been calculated, these aspects are, basin area (A),  
191 basin length (L), basin perimeter (P), bifurcation ratio (Rb), elongation ratio (Re), circularity ratio  
192 (Rc), drainage frequency (Fd) and drainage density (Dd) etc.

### 193 3.1. Stream order ( $S_0$ ) and stream no:

194 The lower Yalamlam basin encompasses through the basin mega fan, which is formed by ancient  
195 and modern radial drainage pattern in the designated study area. The channel of this area is  
196 characterized by higher sinuous, decreased widths and lesser discharge capacity as a numerous  
197 traverse Paleo alluvial channels (Bahrawi et al., 2016). Therefore, the stream ordering of the study  
198 area has been ranked based on Strahler (1964) method and demonstrated in Table 2.

### 199 Table 2. Stream network order based on Strahler method.

| Strahler    | Cnt_Strahler | Rb           | Nu-r | Rb * Nu-r        | Sum_Length  |
|-------------|--------------|--------------|------|------------------|-------------|
| 1           | 598          |              |      |                  | 872.847     |
| 2           | 135          | 4.42963      | 733  | 3246.919         | 452.488     |
| 3           | 22           | 6.13636      | 157  | 963.409          | 237.306     |
| 4           | 6            | 3.66667      | 28   | 102.667          | 112.047     |
| 5           | 2            | 3.00000      | 8    | 24.000           | 54.635      |
| 6           | 1            | 2.00000      | 3    | 6.000            | 58.259      |
| <b>Sum</b>  | 764          | 19.232659932 | 929  | 4342.99427609428 | 1787.582302 |
| <b>Mean</b> |              | <b>3.847</b> |      | <b>4.675</b>     |             |

200

201 **3.2. Bifurcation ratio:**

202 The bifurcation ratio was calculated by the no of streams of an order to the no of the streams of  
203 the next higher order. The values vary from 2.0 to 4.42 of the Yalamlam streams basin, which is  
204 also signified the maximum structural influences (Strahlar, 1964). After the calculation of  
205 bifurcation ratio, calculate the average value which is the mean bifurcation ratio is 3.84 of the  
206 basins. The value also indicates that the drainage pattern has been affected by structural  
207 disturbances within the basin. The obtained no of bifurcation ratio varies from one order to another  
208 order. Such variation is interpreted as irregularities of the lithological and the geological  
209 development within the watershed. The values of bifurcation ratio and mean bifurcation ratio have  
210 been shown in Table 3.

211 **3.4. Drainage texture and drainage density:**

212 Drainage density is an expression of spacing and distribution of channels as proposed by Horton  
213 (1932) that measure the total length of the streams of all orders as calculated with per unit area.  
214 Relative relief and slope gradient of the river basin primarily control the stream density. The stream  
215 density of the watershed has been calculated which is shown in Table 3. The value of drainage

216 density is 0.92 in the study basin. The drainage density has been classified into five kinds of  
217 drainage texture as proposed by Smith (1950).

218 The drainage density more than 8 indicates very fine, the value 8-6 is fine, between 6-4 is moderate,  
219 the value 4 to 2 is coarse and less than 2 represent very coarser drainage texture. The observer  
220 drainage texture is 0.138, signifies the resistant permeable rock with moderate infiltration rate and  
221 moderate relief (Bahrawi et al., 2016). The value of the variation of drainage texture depends on  
222 different kind of natural factors that is rainfall and other climatic characteristics, rock, soil type,  
223 vegetation characteristics, permeability, relief, infiltration capacity within the watershed. The  
224 relationship between the hydrological features and the geological structures is estimated to be with  
225 a high drainage density caused by the mountainous relief in the basin. The lower value of drainage  
226 density reveals that, the region is composed of permeable sub surface material, low relief, dense  
227 vegetal cover which results in the increase of more infiltration capacity in the basin. The value of  
228 high drainage density indicates mountainous relief, thin vegetation and impermeable sub surface  
229 material, highly resistant rock types in the river basin.

### 230 **3.5. Drainage frequency:**

231 Drainage frequency or stream frequency is calculated by the total no of streams per unit area of all  
232 stream orders that proposed by Horton (1932). The correlation value of drainage density and  
233 stream frequency is plays positive of the basin, which suggests that the no of streams, population  
234 has increases with the increase of drainage density. The observed value of stream, frequency is  
235 about of 0.34 for the watershed exhibits the highly positive connection with stream density that  
236 has been shown in Table 3.

### 237 **3.6. Elongation ratio:**

238 The elongation ratio is calculated by the ratio between maximum length of the basin and the  
239 diameter of a circle, which fitted in the same basin area, as proposed by Schumm, (1956). The  
240 elongation ratio value generally varies between 0.6 and 1.0 where a wide variety of geological  
241 condition and climatic characteristics has. According to Strahlar (1964) the values close to 1.0  
242 represent the region belongs to very low relief with less structural influences and the value ranges  
243 from 0.8 to 0.6 are generally associated with much steep slope and high relief. The values of  
244 elongation ratio can be categorized into 3 groups, namely less than 0.7 indicates elongated shape,  
245 and 0.8 to 0.9 values represent the oval shape and more than 0.9 values represent the circular shape  
246 of the basin. So, the elongated ratio of the study area is 0.14 that suggests that the basin shape is  
247 belongs to the much more elongated type (Table 3) of the basin where structural influence is much  
248 all over the basin.

### 249 **3.7. Circularity ratio:**

250 According to Miller (1953) circularity ratio is the ratio between the area of a circle, which fitted  
251 in the basin perimeter, and the total basin area. Circularity ratio is much more influenced by  
252 geological structure, relief, slope, climate, frequency and length of stream and land use land cover  
253 within the basin. The basin circularity ratio is 0.08, which represents that the basin is strongly  
254 elongated and belongs to the heterogeneous geological structure and materials. The observed  
255 values also signify the high run off capacity and low permeable capacity of subsoil and sub-surface  
256 soil along the basin area (Table 3).

### 257 **3.8. Form factor:**

258 Horton (1932) defines the form factor as the ratio between the square of the basin length and basin  
259 area. The values of form factor represent the flow intensity of the study area. Generally, the

260 elongation shape and the values of form factor have a negative relationship that means the smaller  
 261 value indicates the more elongated shape of the basin. The values should always be not exceeds  
 262 0.7854, higher value of form factor represent the higher peak flows of a higher period. The  
 263 observed value of form factor is 0.06 of the Yalamlam watersheds signifies the elongated shape of  
 264 the basin (Table 3). Therefore, the lower values and elongated shaped basin indicates that the  
 265 watershed belongs to the flatter peak flow of shorter duration.

266 **Table 3. Wadi Yalamlam morphometric features**

| Parameters                    | Descriptions | Remarks                                                         |
|-------------------------------|--------------|-----------------------------------------------------------------|
| Basin area (km <sup>2</sup> ) | 1940.3       | The basin area is too large                                     |
| Basin length (km)             | 60.56        | Basin length is very high                                       |
| Basin perimeter (km)          | 417          | High basin perimeter                                            |
| Elongation ratio              | 0.14         | Elongated                                                       |
| Form factor                   | 0.06         | Elongated shape and flatter peak flow                           |
| Circularity ratio             | 0.08         | Strongly elongated and heterogeneous geological structure       |
| Drainage frequency            | 0.34         | Low stream frequency                                            |
| Drainage density              | 0.92         | Drainage density is considerably high                           |
| Drainage texture              | 0.138        | Highly resistant permeable rock with moderate infiltration rate |

267

268 **3.9. Relief and relief ratio if the watershed:**

269 Relative relief is the difference between the highest and lowest elevation of the watershed. The  
 270 relief ratio is the ratio between relative relief and the maximum length of the basin as proposed by  
 271 Schumm, (1956). It can analyses the steepness of the basin and evaluate the intensity of erosion  
 272 process of the study area. Here the relief ratio is 4.17, which indicated that most of the designated  
 273 basin is situated along the mountainous rough slope and much narrower in the lower areas.

274 **3.10. Slope map:**

275 Slope is the ratio between horizontal and vertical surface of a region, which can be expressed by  
276 the percentage and degree. It was found that the most of the area (upper middle part) of Yalamlam  
277 watershed comes under steep, very steep and very high steep slopes that indicate the area having  
278 a much mountainous topography. The main channel slope of the basin comes under gentle slope  
279 (0.042) which designed to flat topography and excellent for the ground water management through  
280 favoring for infiltration.

Commented [R.27]: delete

#### 281 **4. Geo hydrological Inferences from Morphometric Evaluation:**

282 The classification of Remote Sensing data was to quantify the area of all alluvial deposits to the  
283 bare rock area within the designated study area as illustrated in Figure 2. Table 4 indicates that the  
284 area of the alluvial deposits is roughly equal to the bare rock area which means that the watershed  
285 is the watershed is likely to be used for rainwater harvesting (Elhag, 2014 and Elhag and Bahrawi  
286 2014 a).

287 **Table 4. Wadi Yalamlam land cover classifications**

| Land cover category | Area sq. km   | Percentage (%) |
|---------------------|---------------|----------------|
| Vegetation          | 82.7          | 4.26           |
| Alluvial deposit    | 803.3         | 41.4           |
| Bare rocks          | 1054.3        | 54.3           |
| <b>Total</b>        | <b>1940.3</b> | <b>100</b>     |

288

289

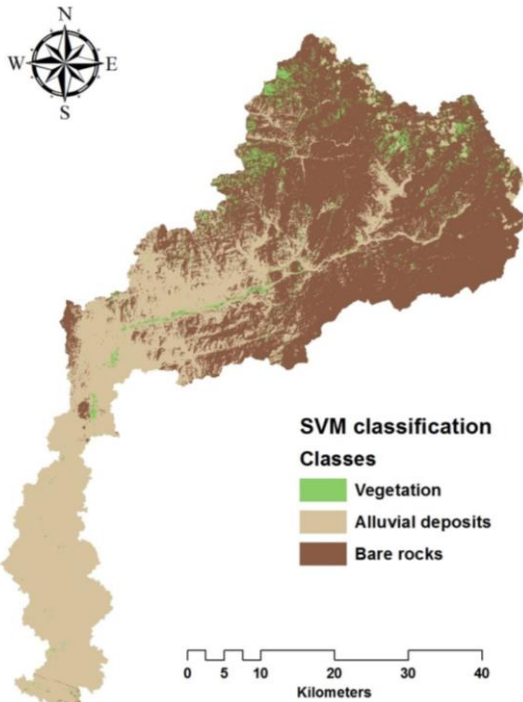

290

291 **Figure 2. Supervised classification of Yalamlam basin.**

292 Morphometric evaluation of the Yalamlam basin based on ASTER GDEM with remote sensing  
 293 and GIS techniques is the most significant method for proper and precise interpretation of  
 294 hydrological parameters of any terrain features. It is also indirectly influence the hydrological  
 295 status of the basin. The quantitative morphometric evaluation has an intense utility to watershed  
 296 delineation, water and soil conservation and their management for future sustainability. The  
 297 morphometric analysis of the Yalamlam basin shows that the watershed has narrow, elongated  
 298 shape and very high mountainous relief. The planning for runoff and artificial recharge of the area  
 299 has been selected based on small-scale topographical maps and low relief (gentle slope) in the

Commented [R.28]: unnecessary text



300 lower area of the basin. Also drainage morphometric makes a positive role through GIS and remote  
301 sensing techniques by selecting artificial recharge sites and the creation of demand storage point  
302 in the mountainous region with the basin. In addition, if the morphometric information is integrated  
303 with other hydrological parameter of the river basin, the strategy for water harvesting and  
304 recharging measures gives a better plan for groundwater management and development for the  
305 future.

306 The drainage pattern of the basin is sub dendritic and radial in nature. The pattern was affected by  
307 more or less heterogeneous structural and lithological characteristics. In addition, high drainage  
308 density is observed all over watershed along with very high relief and impermeable subsoils and  
309 land rock substratum, mountainous terrain slope. On the other hand, lower riparian areas are low  
310 drainage density, which are favorable for the identification of water storage areas and ground water  
311 potential zones. However, slope plays a significant role in determining the relation between  
312 infiltration rate and runoff velocity where infiltration rate is inversely controlled by regional slope.  
313 So all evaluated parameters are more important to the analysis of future water availability of the  
314 study region.

315 Results obtained from pervious scholarly work of Şen, (1995) pointed out that the average  
316 transmissivity values calculated within the study area range from 91 to 147m<sup>2</sup>/day. While the the  
317 transmissivity values increase sharply in the downstream area to range between 267 and 731  
318 m<sup>2</sup>/day (average 500 m<sup>2</sup>/day). Such findings support the hypothesis that the aquifer is of high  
319 potential therein. On the other hand, the hydraulic conductivity values calculated for Yalamlam  
320 basin attain a high hydraulic conductivity (16 m/day) due to more permeable alluvial deposits (Sen,  
321 1995, Elhag and Bahrawi 2014 b,c).

322 **5. Conclusions:**

323 The evaluation of hydrological characteristics of the Yalamlam watershed confirms that the area  
324 is having high relief and the shape is elongated in nature. The stream network of the watershed is  
325 basically dendritic type in lower portion which indicates the lack of structural influences and the  
326 homogeneity of textural characteristics, but the upper portion of the watershed highly influenced  
327 by tectonic and structural activity due to the parallel pattern of the drainage network. The drainage  
328 characteristics of the basin help to understand the different kind of terrain parameters, i.e, runoff,  
329 infiltration capacity and nature of the bedrock etc. The drainage density and frequency of the  
330 drainage basin is low that indicates the high permeability rate and well-drained capacity of the sub  
331 surface formation. All kinds of basic and derived parameters reveal an important the water  
332 recharge areas and measures can be undertaken for the soil conservation structures and water  
333 resource management. Therefore, watershed analysis using remote sensing data, GDEM data and  
334 GIS techniques has an efficient, precise tool for the understanding of any terrain attributes such as  
335 surface runoff, nature of bedrock, and infiltration capacity helps to better understanding of  
336 drainage evolution and management of ground water potential and status of landform and their  
337 characteristics for watershed management and planning. The study will be useful for water as well  
338 as natural resource management of any terrain at the watershed level. For sustainable water  
339 resource management and watershed development decision makers and planners can be used these  
340 kinds of hydrological analysis.

341 The thickness of the saturated zone within the aquifer varies from less than 1 m upstream of  
342 Yalamlam to about 30 m in the Sa'diyah area. The aquifer is generally unconfined, especially in  
343 the upper parts of the wadi. Semi-confining conditions may exist in the lower parts where layers

344 of clay exist. There are about 31 wells in the basin of Wadi Yalamlam, out of which, 23 are hand-  
345 dug wells and the others are drilled.

**Commented [R.29]:** this paragraph is misplaced it should be rephrased and moved to study area description

### 346 **Acknowledgement**

347 This article was funded by the Deanship of Scientific Research (DSR) at King Abdulaziz  
348 University, Jeddah. The authors, therefore, acknowledged with thanks DSR for technical and  
349 financial support.

350

### 351 **References**

352 Bahrawi, J. A., Elhag, M., Aldhebiani, A. Y., Galal, H. K., Hegazy, A. K. and Alghailani, E.  
353 (2016). Soil Erosion Estimation Using Remote Sensing techniques in Wadi Yalamlam  
354 basin, Saudi Arabia. *Advances in Materials Science and Engineering*,  
355 DOI.org/10.1155/2016/9585962.

356 Drouineau, G. (1942). Dosage rapid du calcire actif du sol. Nouvelles donnes sur lareportation de  
357 la nature des fractions calcaires. *Annual Agronomy*, 12: 411 - 450.

358 Elhag, M. (2014). Remotely sensed vegetation indices and spatial decision support system for  
359 better water consumption Regime in Nile Delta. A case study for rice cultivation suitability  
360 map. *Life Science Journal*, 11(1): 201-209.

361 Elhag, M. (2015). Characterization of a Typical Mediterranean Watershed Using Remote Sensing  
362 Techniques and GIS Tools. *Hydrology: Current Research*, 6(1): 197-204.

363 Elhag, M. (2016). Evaluation of Different Soil Salinity Mapping Using Remote Sensing  
364 Techniques in Arid Ecosystems, Saudi Arabia. *Journal of Sensors*, 2016: 96175-96175.

365 Elhag, M. and Bahrawi, J. (2014a). Cloud Coverage Disruption for Groundwater Recharge  
366 Improvement Using Remote Sensing Techniques in Asir Region, Saudi Arabia. *Life  
367 Science Journal*, 11(1): 192-200.

368 Elhag, M. and Bahrawi, J. (2014b). Conservational Use of Remote Sensing Techniques for a  
369 Novel Rainwater Harvesting in Arid Environment. *Environmental Earth Sciences*, 72(12):  
370 4995-5005.

371 Elhag, M. and Bahrawi, J. (2014c). Potential Rainwater Harvesting Improvement Using Advanced  
372 Remote Sensing Applications. *The Scientific World Journal*, DOI: 10.1155/2014/806959.

373 Elhag, M. and Bahrawi, J. (2017). Realization of Daily Evapotranspiration in Arid Ecosystems  
374 Based on Remote Sensing Techniques. *Geoscientific Instrumentation, Methods and Data*  
375 *Systems*, 6: 1-10.

376 Elhag, M., Psilovikos, A. and Sakellariou, M. (2013). Detection of Land Cover Changes for Water  
377 Recourses Management Using Remote Sensing Data over the Nile Delta Region.  
378 *Environment, Development and Sustainability*, 15(5): 1189-1204.

379 Farr, T. G. and Kobrick, M. (2000). Shuttle radar topography mission produces a wealth of data.  
380 *American Geophysical Union*, 81: 583–585.

381 Gotway, C. A., Ferguson, R. B., Hergert G. W. and Peterson, T. A. (1996). Comparison of kriging  
382 and inverse distance methods for mapping soil parameters. *Soil Science Society of America*  
383 *Journal*, 60: 1237-1247.

384 Grohmann, C. H., Riccomini, C. and Alves, F. M. (2007). SRTM-based morphotectonic analysis  
385 of the Pocos de Caldas alkaline Massif, southeastern Brazil. *Computers and Geosciences*.  
386 33: 10–19.

387 Hadley, R. F. and Schumn, S. A. (1961). Sediment sources and drainage basin characteristics in  
388 the upper Cheyenn River Basin. US Geological Survey. Water supply paper, 1531-B: 137-  
389 97.

390 Horton, R. E. (1945). Erosional development of streams and their drainage basins; hydrophysical  
391 approach to quantitative morphology. U.S. Geological Survey Professional, p.282A.

392 Horton, R.E. (1932). Drainage basin characteristics. *Trans. Amer. Geophys. Union* 13, 350–361.

393 Johnson, L. W. and Riess, R. D. (1982). Numerical Analysis, 2nd ed. (Reading, MA:  
394 AddisonWesley), Chapter, 1.3.

395 Leenaers, H., Okx, J. P. and Burrough, P. A. (1990). Employing elevation data for efficient  
396 mapping of soil pollution on floodplain. *Soil Use and Management*, 6: 105-113.

397 Magesh, N., Chandrasekar, N. and Soundranayagam, J. (2011). Morphometric evaluation of  
398 Papanasam and Manimuthar watersheds, parts of Western Ghats, Tirunelveli district,  
399 Tamil Nadu, India: a GIS approach. *Environmental Earth Sciences*, 64: 373–381.

400 McLean, E. O. (1982). Soil pH and lime requirement. p. 199 - 224, In A. L. Page (ed.), *Methods*  
401 *of soil analysis, Part 2: chemical and microbiological properties*. American Society of  
402 Agronomy, Madison, WI, USA.

403 Miller, V. C. (1953). A Quantitative Geomorphologic Study of Drainage Basin Characteristics in  
404 the Clinch Mountain Area, Virginia and Tennessee, Project NR 389042, Tech Rept 3.  
405 Columbia University Department of Geology, ONR Geography Branch, New York.

406 Mueller, T. G., Pusuluri, N. B., Mathias, K. K., Cornelius, P. L., Barnhisel, R. I. and Shearer, S.  
407 A. (2004). Map Quality for Ordinary Kriging and Inverse Distance Weighted Interpolation.  
408 *Soil Science Society of America Journal*, 68: 2042-2047.

409 Panhalkar, S. S. (2014). Hydrological modeling using SWAT model and geoinformatic techniques.  
410 *Egypt. The Egyptian Journal of Remote Sensing and Space Science*, 17(2): 197–207.

411 Pankaj, A. and Kumar, P. (2009). GIS based morphometric analysis of five major sub-watershed  
412 of Song River, Dehradun district, Uttarakhand with special reference to landslide  
413 incidences. *Journal of the Indian Society of Remote Sensing*, 37: 157–166.

414 Psilovikos, A. and Elhag, M. (2013). Forecasting of Remotely Sensed Daily Evapotranspiration  
415 Data over Nile Delta Region, Egypt, *Water Resources Management*, 27(12): 4115-4130.

416 Richards, L. A. (1954). Diagnosis and improvement of saline and alkali soils. *USDA Agric.*  
417 *Handbook 60*. Washington, D. C.

418 Schloeder, C. A., Zimmerman, N. E. and Jacobs, M. J. (2001). Comparison of methods for  
419 interpolating soil properties using limited data. *Soil Science Society of America Journal*,  
420 65: 470-479.

421 Schumm, S. A. (1956). Evolution of drainage systems and slopes in badlands at Perth Amboy,  
422 New Jersey. *National Geological Society of America Bulletin*, 67: 597-646.

423 Schumm, S. A. (1963). Sinuosity of alluvial rivers in the Great Plains. *Bull. Geol. Soc. Am.* 74,  
424 1089–1100.

425 Sen, Z. (1995). *Wadi Hydrology*. CRC Press, Taylor and Francis, New York.

426 Smith, K. G. (1950). Standards for grading texture of erosional topography. *American Journal of*  
427 *Science*, 248: 655-668.

428 Sreedevi, P. D., Sreekanth, P. D., Khan, H. H. and Ahmed, S. (2013). Drainage morphometry and  
429 its influence on hydrology in a semi-arid region: using SRTM data and GIS. *Environmental*  
430 *Earth Science*, 70 (2): 839–848.

431 Stoer, J. and Bulirsch, R. (1980). *Introduction to Numerical Analysis* (New York: Springer-  
432 Verlag), Chapter 2.

433 Strahler, A. N. (1964). Quantitative Geomorphology of drainage basins and channel networks.  
434 *Handbook of Applied Hydrology*; edited by V.T Chow (Newyork; Mc Graw hill) Section  
435 4-11.

436 Strahler, A.N., (1957). Quantitative analysis of watershed geomorphology. *Trans. Am. Geophys.*  
437 *Union* 38, 913–920.

438 Walsh, L. M. and Beaton, J. D. (1973). *Soil testing and plant analysis*. Soil Science Society of  
439 America, Madison. WI, USA.

440 Weibel, R. (1997). A Typology of Constraints to Line Simplification. In: Kraak, M. J. and  
441 Molenaar, M. (eds.): *Advances in GIS Research II* (7th International Symposium on Spatial  
442 Data Handling). London: Taylor and Francis, pp. 533-546.

443 Weller, U., Zipprich, M., Sommer, M., zu Castell, W. and Wehrhan, M. (2007). Mapping clay  
444 content across boundaries at the landscape scale with electromagnetic induction. *Soil*  
445 *Science Society of America Journal*, 71:1740–1747.

446 Westerman, R. L. (1990). *Soil testing and plant analysis*. 3<sup>rd</sup> ed. Soil Science Society of America,  
447 Madison, WI, USA.

448 Wollenhaupt, N. C., Wolkowski, R. P. and Clayton, M. K. (1994). Mapping soil test phosphorus  
449 and potassium for variable-rate fertilizer application. *Journal of Production Agriculture*,  
450 7(4):441-448.

451 YanYun, N. I. A. N., Xin, L. I., Jian, Z. H. O. U., and XiaoLi. H. U. (2014). Impact of land use  
452 change on water resource allocation in the middle reaches of the Heihe River Basin in  
453 northwestern China. *Journal of Arid Land*, 6 (3), 273–286.

454

455

456

457
